# Supplementary material
Source: PubMed Central journal article supplement (PMC5383389)
Supplement: CJN.09280916SupplementaryData.pdf [file CJN.09280916SupplementaryData.pdf]

**Supplemental Table 1. The baseline characteristics of participants included in the RENIS-FU study and those lost to follow-up.**

| Characteristic                                                 | Baseline          | Included          | Lost to           | P-value <sup>a</sup> |
|----------------------------------------------------------------|-------------------|-------------------|-------------------|----------------------|
|                                                                | measurements      | in follow-up      | follow-up         |                      |
|                                                                | N=1590            | N=1296            | N=294             |                      |
| Male, n(%)                                                     | 778 (49 %)        | 641 (49 %)        | 137 (47 %)        | 0.38                 |
| Age, years                                                     | 58.0 (3.8)        | 58.0 (3.9)        | 58.4 (3.7)        | 0.07                 |
| Height, cm                                                     | 170.7 (8.7)       | 170.8 (8.6)       | 169.9 (9.3)       | 0.09                 |
| Body weight, kg                                                | 79.5 (14.3)       | 79.4 (13.9)       | 80.1 (16.1)       | 0.44                 |
| Body mass index, kg/m <sup>2</sup>                             | 27.2 (4.0)        | 27.1 (3.8)        | 27.6 (4.5)        | 0.04                 |
| TNFR2, pg/ml                                                   | 2670 (652)        | 2661 (624)        | 2708 (762)        | 0.26                 |
| hsCRP, mg/l                                                    | 1.19 (0.64-2.19)  | 1.17 (0.64-2.13)  | 1.24 (0.63-2.64)  | 0.15                 |
| Systolic blood pressure, mmHg                                  | 129.4 (17.5)      | 129.1 (17.4)      | 130.9 (18.1)      | 0.11                 |
| Diastolic blood pressure, mmHg                                 | 83.4 (9.8)        | 83.3 (9.8)        | 83.6 (9.8)        | 0.58                 |
| Fasting glucose, mg/dl                                         | 95.8 (8.7)        | 95.7 (8.5)        | 96.4 (9.3)        | 0.22                 |
| Hemoglobin A1c, %                                              | 5.54 (0.33)       | 5.52 (0.33)       | 5.58 (0.32)       | 0.01                 |
| LDL cholesterol, mg/dl                                         | 141.5 (33.2)      | 141.6 (32.9)      | 141.1 (34.2)      | 0.81                 |
| HDL cholesterol, mg/dl                                         | 59.3 (16.2)       | 59.5 (16.1)       | 58.5 (16.9)       | 0.33                 |
| Fasting triglycerides, mg/dl                                   | 88.5 (70.8-132.8) | 88.5 (70.8-123.9) | 88.5 (70.8-132.8) | 0.32                 |
| UACR, mg/g                                                     | 2.04 (0.88-4.78)  | 1.92 (0.88-4.60)  | 2.65 (0.88-5.40)  | 0.02                 |
| ACEi, n(%)                                                     | 28 (1.8 %)        | 26 (2.0 %)        | 2 (0.7 %)         | 0.14                 |
| ARB, n(%)                                                      | 131 (8.2 %)       | 104 (8.0 %)       | 27 (9.2 %)        | 0.51                 |
| NSAIDs, n(%)                                                   | 37 (2.3 %)        | 30 (2.3 %)        | 7 (2.4 %)         | 0.95                 |
| Current smoker, n(%)                                           | 323 (20 %)        | 241 (19 %)        | 82 (28 %)         | <0.001               |
| Alcohol consumption, %                                         | 428 (27.2 %)      | 362 (28.1 %)      | 66 (23.0 %)       | 0.08                 |
| Absolute mGFR, ml/min                                          | 103.8 (20.0)      | 103.6 (19.6)      | 104.5 (21.4)      | 0.48                 |
| mGFR, ml/min/1.73 m <sup>2</sup>                               | 93.8 (14.3)       | 93.7 (14.2)       | 94.5 (14.8)       | 0.34                 |
| <b>eGFR by CKD-EPI equation,<br/>ml/min/1.73 m<sup>2</sup></b> |                   |                   |                   |                      |
| eGFR <sub>crea</sub>                                           | 94.8 (9.6)        | 94.8 (9.3)        | 94.7 (10.6)       | 0.79                 |
| eGFR <sub>cys</sub>                                            | 105.4 (12.3)      | 105.7 (12.1)      | 104.4 (13.1)      | 0.11                 |
| eGFR <sub>crecys</sub>                                         | 103.0 (11.4)      | 103.1 (11.2)      | 102.5 (12.5)      | 0.38                 |

Estimates are given as mean (standard deviation), median (interquartile range) or number (percent).

RENIS-FU, the Renal Iohexol-clearance Survey Follow-up Study; TNFR2, soluble tumor necrosis factor receptor 2; hsCRP, high-sensitivity C-reactive protein; LDL, low-density lipoprotein; HDL, high-density lipoprotein; UACR, urinary albumin-creatinine ratio; ACE, angiotensin converting enzyme; ARB, angiotensin receptor blocker; NSAIDs, non-steroid antiinflammatory drugs; mGFR, measured glomerular filtration rate; eGFR, estimated GFR; CKD-EPI, Chronic Kidney Disease Epidemiology Collaboration; eGFR<sub>crea</sub>, eGFR based on creatinine; eGFR<sub>cys</sub>, eGFR based on cystatin C; eGFR<sub>crecys</sub>, eGFR based on creatinine and cystatin C. <sup>a</sup>P-value for differences between those included in the RENIS-FU study and those lost to follow-up.

**Supplemental Table 2. Comparisons of fractional polynomial models<sup>a</sup> for the association of TNFR2 with the annual GFR change. The Renal Iohexol-clearance Survey Follow-Up Study.**

| Comparison           | Deviance difference | D.f. | P-value | Power(s) for best model |     |   |
|----------------------|---------------------|------|---------|-------------------------|-----|---|
|                      |                     |      |         | FP2                     | FP1 |   |
| FP2 vs. null model   | 20.16               | 4    | <0.001  | -1                      | 3   | 3 |
| FP2 vs. linear model | 15.94               | 3    | 0.001   |                         |     |   |
| FP2 vs. FP1          | 1.60                | 2    | 0.45    |                         |     |   |

**TNFR2, soluble tumor necrosis factor receptor 2; GFR, glomerular filtration rate; FP2 and FP1, fractional polynomial transformations of second and first degree; d.f, degrees of freedom.**

<sup>a</sup>All the models were adjusted for the same independent variables as in Model 2 of Table 4.

**Supplemental Table 3. The association of hsCRP with the annual change in measured and estimated GFR after excluding subjects with hsCRP > 10 mg/L in linear mixed regression models. The Renal Iohexol-clearance Survey Follow-Up Study.**

| Dependent variable and hsCRP as risk factor <sup>a</sup> | Model 1 unadjusted                          |               |         | Model 2 adjusted for baseline covariates <sup>b</sup> |               |         | Model 3 adjusted for time-dependent covariates <sup>b</sup> |               |         |
|----------------------------------------------------------|---------------------------------------------|---------------|---------|-------------------------------------------------------|---------------|---------|-------------------------------------------------------------|---------------|---------|
|                                                          | Estimate (ml/min/1.73 m <sup>2</sup> /year) | 95% CI        | P value | Estimate (ml/min/1.73 m <sup>2</sup> /year)           | 95% CI        | P value | Estimate (ml/min/1.73 m <sup>2</sup> /year)                 | 95% CI        | P value |
| <b>mGFR</b>                                              | -0.01                                       | -0.07 to 0.04 | 0.62    | -0.001                                                | -0.06 to 0.05 | 0.90    | -0.001                                                      | -0.06 to 0.05 | 0.90    |
| <b>eGFRcre</b>                                           | 0.001                                       | -0.03 to 0.04 | 0.93    | 0.001                                                 | -0.04 to 0.04 | 0.90    | 0.003                                                       | -0.03 to 0.04 | 0.86    |
| <b>eGFRcys</b>                                           | 0.006                                       | -0.04 to 0.05 | 0.78    | 0.01                                                  | -0.04 to 0.06 | 0.66    | 0.001                                                       | -0.04 to 0.05 | 0.90    |
| <b>eGFRcrecys</b>                                        | 0.01                                        | -0.03 to 0.05 | 0.62    | 0.01                                                  | -0.03 to 0.05 | 0.65    | 0.005                                                       | -0.03 to 0.05 | 0.79    |

**hsCRP, high-sensitivity C-reactive protein; GFR, glomerular filtration rate; CI, confidence interval; mGFR, measured GFR; eGFRcre, estimated GFR based on creatinine; eGFRcys, estimated GFR based on cystatin C; eGFRcrecys, estimated GFR based on creatinine and cystatin C.**

<sup>a</sup>The estimates represent 1 mg/L increase in hsCRP on the mean annual mGFR/eGFR decline rates. A positive estimate represents a slower decline.

<sup>b</sup>Adjusted for sex, weight, height, systolic blood pressure, LDL-cholesterol, HDL-cholesterol, fasting triglycerides, HbA1c, urinary ACR, number of cigarettes currently smoked, the use of ACEi, ARB or NSAID; and a dichotomous variable for the weekly use of alcohol.

**Supplemental Table 4. The association of TNFR2 with the annual change in measured and estimated GFR after excluding subjects with CKD (GFR < 60 ml/min/1.73 m<sup>2</sup>) at baseline in linear mixed regression models. The Renal Iohexol-clearance Survey Follow-Up Study.**

| Dependent variable and TNFR2 as risk factor per SD <sup>a</sup> | Model 1 unadjusted                          |               |         | Model 2 adjusted for baseline covariates <sup>b</sup> |               |         | Model 3 adjusted for time-dependent covariates <sup>b</sup> |               |         |
|-----------------------------------------------------------------|---------------------------------------------|---------------|---------|-------------------------------------------------------|---------------|---------|-------------------------------------------------------------|---------------|---------|
|                                                                 | Estimate (ml/min/1.73 m <sup>2</sup> /year) | 95% CI        | P value | Estimate (ml/min/1.73 m <sup>2</sup> /year)           | 95% CI        | P value | Estimate (ml/min/1.73 m <sup>2</sup> /year)                 | 95% CI        | P value |
| <b>mGFR</b>                                                     | 0.06                                        | -0.02 to 0.15 | 0.15    | 0.10                                                  | 0.01 to 0.19  | 0.03    | 0.11                                                        | 0.01 to 0.20  | 0.01    |
| <b>eGFRcre</b>                                                  | 0.01                                        | -0.05 to 0.07 | 0.78    | 0.02                                                  | -0.05 to 0.08 | 0.61    | 0.02                                                        | -0.04 to 0.08 | 0.57    |
| <b>eGFRcys</b>                                                  | 0.06                                        | -0.02 to 0.14 | 0.12    | 0.09                                                  | 0.01 to 0.16  | 0.03    | 0.07                                                        | -0.01 to 0.14 | 0.07    |
| <b>eGFRcrecys</b>                                               | 0.08                                        | 0.01 to 0.15  | 0.02    | 0.09                                                  | 0.02 to 0.16  | 0.008   | 0.08                                                        | 0.02 to 0.15  | 0.02    |

**TNFR2, soluble tumor necrosis factor receptor 2; GFR, glomerular filtration rate; CI, confidence interval; mGFR, measured GFR; eGFRcre, estimated GFR based on creatinine; eGFRcys, estimated GFR based on cystatin C; eGFRcrecys, estimated GFR based on creatinine and cystatin C.**

<sup>a</sup>The estimates represent 1 standard deviation increase in TNFR2 (SD=651.5) on the mean annual mGFR/eGFR decline rates. A positive estimate represents a slower decline. <sup>b</sup>Adjusted for sex, weight, height, systolic blood pressure, LDL-cholesterol, HDL-cholesterol, fasting triglycerides, HbA1c, urinary ACR, number of cigarettes currently smoked, the use of ACEi, ARB or NSAID; and a dichotomous variable for the weekly use of alcohol.
